# Supplementary material for: Scabiosa stellata L. Phenolic Content Clarifies Its Antioxidant Activity
Source: PubMed Central journal article supplement (PMC6100036; doi:10.3390/molecules23061285), 2018-05-27
Supplement: molecules-23-01285-s001.pdf [file molecules-23-01285-s001.pdf]

## Supplementary Material

Table S1. Selection of the most significant chemical shift values found in the  $^1\text{H}$  and  $^{13}\text{C}$  NMR spectra (recorded in MeOH and 500 MHz) of the compound **13**.

| C <sub>number</sub> | $\delta_{\text{C}}$ (ppm) | $\delta_{\text{H}}$ (ppm)        |
|---------------------|---------------------------|----------------------------------|
| 2                   | 185.4                     | -                                |
| 3                   | 143.3                     | -                                |
| 4                   | 179.2                     | -                                |
| 5                   | 163.2                     | -                                |
| 6                   | 99.81                     | 6.21 (d, <i>J</i> 2.1 Hz)        |
| 7                   | 165.8                     | -                                |
| 8                   | 94.8                      | 6.41 (d, <i>J</i> 2.1 Hz)        |
| 8a                  | 158.6                     | -                                |
| 4a                  | 105.9                     | -                                |
| 1'                  | 123.3                     | -                                |
| 2'                  | 114.5                     | 7.96 (d, <i>J</i> 2.1 Hz)        |
| 3'                  | 148.4                     | -                                |
| 4'                  | 150.6                     | -                                |
| 5'                  | 116.1                     | 6.94 (d, <i>J</i> 8.4Hz)         |
| 6'                  | 123.7                     | 7.60 (dd, <i>J</i> 2.1; 8.4 Hz)  |
| glucose 1''         | 100.5                     | 5.75 (d, <i>J</i> 7.7 Hz)        |
| 2''                 | 80.1                      | 3.67 (dd, <i>J</i> 7.7; 2.2 Hz)  |
| 3''                 | 78.8                      | 3.58-3.64 (m)                    |
| 4''                 | 73.9                      | 3.58-3.64 (m)                    |
| 5''                 | 77.2                      | 3.32-3.35 (m)                    |
| 6''                 | 68.1                      | 3.45-3.48(m)                     |
|                     |                           | 3.86 (dd, <i>J</i> 11.4; 1.6 Hz) |
| rhamnose 1'''       | 102.5                     | 5.21 (d, <i>J</i> 1.3 Hz)        |
| 2'''                | 72.0                      | 3.98-4.02 (m)                    |
| 3'''                | 72.3                      | 3.45-3.49 (m)                    |
| 4'''                | 73.9                      | 3.30-3.33 (m)                    |
| 5'''                | 69.9                      | 4.06 (dq, <i>J</i> 9.8; 6.2 Hz)  |
| 6'''                | 17.4                      | 0.93 (d, <i>J</i> 6.2 Hz)        |
| rhamnose 1''''      | 102.8                     | 4.56 (d, <i>J</i> 1.5Hz)         |
| 2''''               | 72.1                      | 3.59-3.62 (m)                    |
| 3''''               | 72.3                      | 3.45-3.49 (m)                    |
| 4''''               | 73.8                      | 3.22-3.27 (m)                    |
| 5''''               | 69.8                      | 3.38-3.43 (m)                    |
| 6''''               | 17.8                      | 1.08 (d, <i>J</i> 6.2 Hz)        |

|                  |      |          |
|------------------|------|----------|
| OCH <sub>3</sub> | 57.0 | 3.98 (s) |
|------------------|------|----------|

Table S2. Linearity ( $y = mx + b$ , where  $y$  corresponds to the standard peak area and  $x$  corresponds to the mass of standard), LOD and LOQ of pure compounds used as reference

| Standard compound       | Range concentration <sup>§</sup> | Slope (m) <sup>§§</sup> | Intercept (b) <sup>§§</sup> | R <sup>2</sup> | LOD <sup>§</sup> | LOQ <sup>§</sup> |
|-------------------------|----------------------------------|-------------------------|-----------------------------|----------------|------------------|------------------|
| Benzoic acid            | 0.5-500                          | 16748                   | 111                         | 1.0000         | 12               | 40               |
| Gallic acid             | 0.5-500                          | 557                     | -728                        | 0.9988         | 11               | 37               |
| Catechin                | 0.5-250                          | 142                     | -58                         | 0.9997         | 8                | 27               |
| Caffeic acid            | 0.5-550                          | 618                     | -70                         | 0.9998         | 14               | 47               |
| <i>p</i> -Coumaric acid | 0.5-550                          | 716                     | 122                         | 0.9990         | 15               | 50               |
| Ferulic acid            | 0.5-500                          | 1633                    | 6                           | 0.9993         | 10               | 33               |
| Rosmarinic acid         | 0.5-250                          | 706                     | 1228                        | 0.9976         | 7                | 23               |
| Chlorogenic acid        | 0.5-250                          | 659                     | -8                          | 0.9989         | 9                | 30               |
| Isorhamnetin            | 0.5-100                          | 629                     | -2316                       | 0.9991         | 3                | 10               |
| Kaempferol              | 0.5-175                          | 792                     | -76                         | 0.9969         | 5                | 17               |
| Luteolin                | 0.5-100                          | 354                     | -221                        | 1.0000         | 3                | 10               |
| Quercetin               | 0.5-175                          | 317                     | -3                          | 0.9992         | 4                | 13               |

<sup>§</sup>in  $\mu\text{g/mL}$

<sup>§§</sup>in area counts/mg

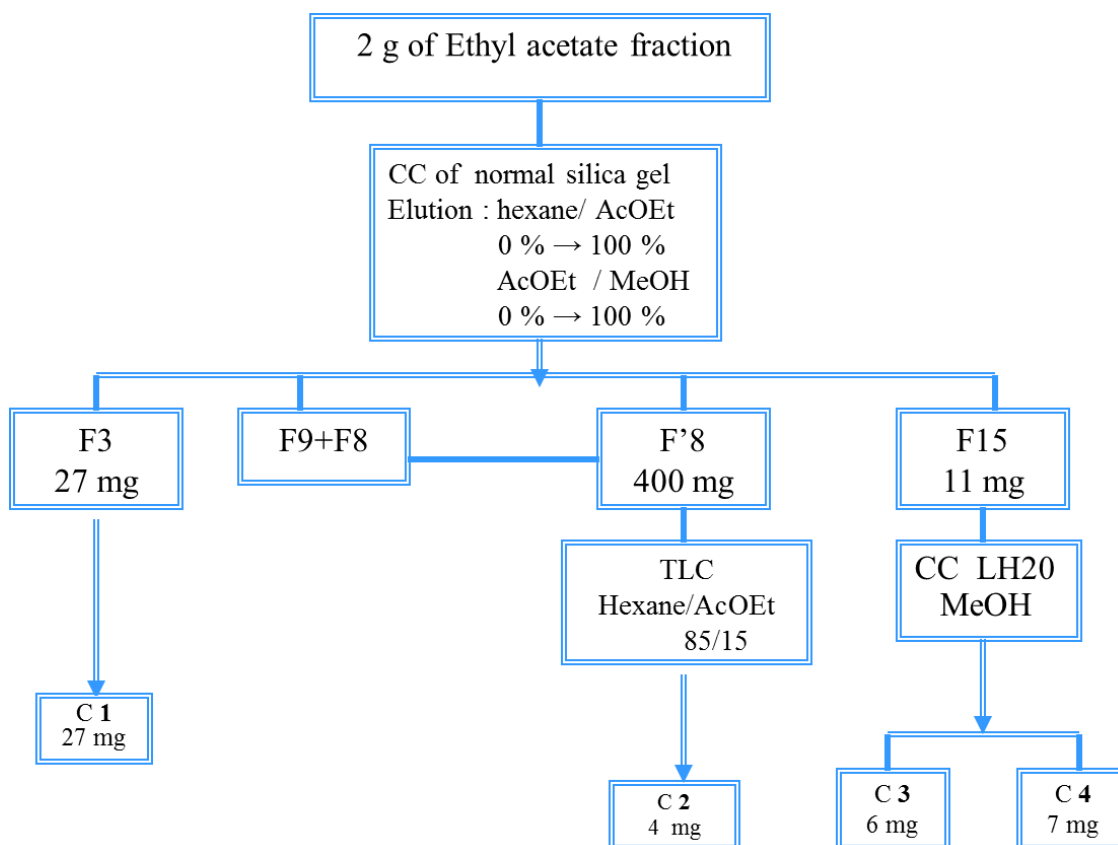

Figure S1. Scheme of the ethyl acetate fraction purification

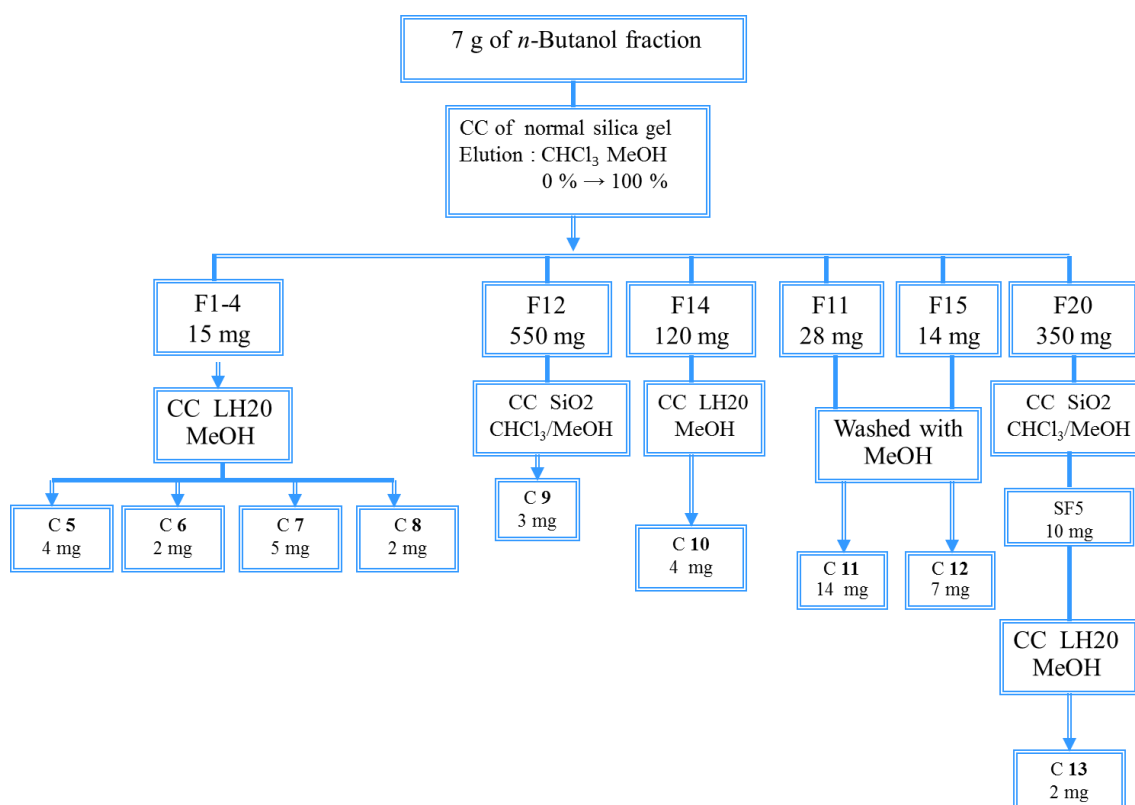

Figure S2. Scheme of the *n*-butanol fraction purification
